# Supplementary material for: Synthesis and efficient electrocatalytic performance of Bi2O3/Dy2O3 nanoflakes
Source: publisher site journal article supplement (doi:10.1515/ijmr-2022-0338), 2023-02-16
Supplement: Supplementary file 1 [file j_ijmr-2022-0338_suppl_001.docx]

Xiaoyu Wang, Zizhan Sun, Chunhu Yu, Zhengyu Cai, Chuangang Fan and Lizhai Pei[[1]](#footnote-2)*

Synthesis and efficient electrocatalytic performance of Bi2O3/Dy2O3 nanoflakes

Figure S1 shows the SEM images of the Bi2O3/Dy2O3 nanocomposites with different magnifications prepared from 180 ℃ for 24 h using CTAB with different concentrations. When no CTAB is used for the synthesis of the nanocomposites, the products are entirely composed of sub-microscale and nanoscale particles with the size of less than 500 nm (Figure S1a and b). When 1 wt.% CTAB is added in the hydrothermal reaction system, some nanoflake-shaped structures with a thickness of about 15 nm are formed besides sub-microscale and nanoscale particles (Figure S1c and d). With the CTAB concentration increasing to 3 wt.%, the amount of the Bi2O3/Dy2O3 nanoflakes increases clearly (Figure S1e and f). Figure S2 shows the XRD patterns of the Bi2O3/Dy2O3 nanocomposites prepared from 180 ℃ for 24 h using CTAB with different concentrations. The crystal structure of the products obtained without CTAB (Figure S2a) is the same as that of the products synthesized from 1 wt.% and 3 wt.% CTAB (Figure S2b and c). The products contain triclinic Bi2O3 and cubic Dy2O3 phases.

Figure S3 shows the SEM images of the Bi2O3/Dy2O3 nanocomposites with different magnifications prepared from 180 ℃ for different time using 5 wt.% CTAB. The products are mainly composed of nanoscale particles with sizes of less than 100 nm besides a small amount of nanoflakes when the reaction time is 0.5 h at 180 ℃ using 5 wt.% CTAB (Figure S3a and b). With the reaction time increasing to 12 h at 180 ℃ using 5 wt.% CTAB, a large amount of nanoflakes with a thickness of about 10 nm are formed (Figure S3c and d). Figure S4 shows the XRD patterns of the Bi2O3/Dy2O3 nanocomposites prepared from 180 ℃ for different times using 5 wt.% CTAB. The nanocomposites prepared from 0.5 h and 12 h, respectively possess triclinic Bi2O3 and cubic Dy2O3 phases (Figure S4a and b) which is the same as those of the nanoflakes prepared for 24 h. Only the intensity of the diffraction peaks of the triclinic Bi2O3 and cubic Dy2O3 phases increases slightly with increasing reaction time.

Figure S5 shows the SEM images of the Bi2O3/Dy2O3 nanocomposites prepared from different temperatures for 24 h using 5 wt.% CTAB. The obtained products mainly consist of nanoflakes with a thickness of about 10 nm when the hydrothermal reaction conditions are 80 ℃ for 24 h using 5 wt.% CTAB (Figure S5a and b). As the reaction temperature is prolonged to 120 ℃, the products are entirely composed of nanoflakes and the thickness increases to about 20 nm (Figure S5c and d)). Figure S6 shows the XRD patterns of the Bi2O3/Dy2O3 nanocomposites prepared from different temperatures for 24 h using 5 wt.% CTAB. XRD results show that the nanocomposites prepared at different temperatures for 24 h using 5 wt.% CTAB also consist of triclinic Bi2O3 and cubic Dy2O3 phases. The intensity of the diffraction peaks of the nanocomposites prepared from 80 ℃ (Figure S6a) is obviously lower than that of the nanocomposites prepared at 120 ℃ (Figure S6b).

**Figure captions**

**Figure S1:** SEM images of the Bi2O3/Dy2O3 nanocomposites prepared at 180 ℃ for 24 h using CTAB with different concentrations. (a) and (b) 0; (c) and (d) 1 wt.%; (e) and (f) 3 wt.%.

**Figure S2:** XRD patterns of the Bi2O3/Dy2O3 nanocomposites prepared at 180 ℃ for 24 h using CTAB with different concentrations. (a) 0; (b) 1 wt.%; (c) 3 wt.%.

**Figure S3:** SEM images of the Bi2O3/Dy2O3 nanocomposites with different magnifications prepared at 180 ℃ for different time using 5 wt.% CTAB. (a) and (b) 0.5 h; (c) and (d) 12 h.

**Figure S4:** XRD patterns of the Bi2O3/Dy2O3 nanocomposites prepared at 180 ℃ for different times using 5 wt.% CTAB. (a) 0.5 h; (b) 12 h.

**Figure S5:** SEM images of the Bi2O3/Dy2O3 nanocomposites with different magnifications prepared at different temperatures for 24 h using 5 wt.% CTAB. (a) and (b) 80 ℃; (c) and (d) 120 ℃.

**Figure S6:** XRD patterns of the Bi2O3/Dy2O3 nanocomposites prepared at different temperatures for 24 h using 5 wt.% CTAB. (a) 80 ℃; (b) 120 ℃.

1. *** Corresponding author: Lzhai Pei,** School of Materials Science and Engineering, Anhui University of Technology, Ma’anshan, Anhui 243002, P. R. China.

   E-mail: lzpei1977@163.com, lzpei@ahut.edu.cn. https://orcid.org/0000-0002-8046-6622

   **Xiaoyu Wang, Zizhan Sun, Chunhu Yu, Zhengyu Cai and Chuangang Fan.** School of Materials Science and Engineering, Anhui University of Technology, Ma’anshan, Anhui 243002, P. R. China [↑](#footnote-ref-2)
